# Supplementary material
Source: publisher figshare collection journal article supplement (https://tandf.figshare.com/articles/dataset/_/8791991)
Supplement: Supplementary file 1 [file 1]

Archive with 2 entries (2 files):
- tbeq_a_1637279_sm5483.pdf
- tbeq_a_1637279_sm5475.pdf
