# Supplementary material
Source: publisher figshare collection journal article supplement (https://tandf.figshare.com/articles/dataset/_/8791991)
Supplement: Supplementary file 1 [file 1 › tbeq_a_1637279_sm5483.pdf]

# SUPPLEMENTAL TABLE

Supplement to:

**Antifungal activity and functional components of cell-free supernatant from *Bacillus amyloliquefaciens* LZN01 inhibit *Fusarium oxysporum* f. sp. *niveum* growth**

Weihui Xu, Hengxu Wang, Zhihang Lv, Yiran Shi and Zhigang Wang

Biotechnol. Biotechnol. Equip. 2019, **33**

**Table S1** Compounds in the CFS from *B. amyloliquefaciens* LZN01 and LB medium.

| 72h-ck                     |     |                      |                      | 12h-ck                                                                                                                                                 |     |                      |                      | 12h-72h                                                               |     |                      |                       |
|----------------------------|-----|----------------------|----------------------|--------------------------------------------------------------------------------------------------------------------------------------------------------|-----|----------------------|----------------------|-----------------------------------------------------------------------|-----|----------------------|-----------------------|
| Metabolites                | m/z | Retention time (min) | Fold change (72h/ck) | Metabolites                                                                                                                                            | m/z | Retention time (min) | Fold change (12h/ck) | Metabolites                                                           | m/z | Retention time (min) | Fold change (72h/12h) |
| Asp-Pro-Lys                | 359 | 1.85                 | 0.11                 | N-epsilon-Acetyl-L-lysine                                                                                                                              | 189 | 1.80                 | 0.05                 | S-Japonin                                                             | 695 | 2.57                 | 4.95                  |
| L-Arginine                 | 173 | 0.73                 | 0.02                 | L-isoleucyl-L-proline                                                                                                                                  | 229 | 2.25                 | 0.21                 | L-Isoleucine                                                          | 130 | 1.29                 | 0.01                  |
| N-epsilon.-Acetyl-L-lysine | 189 | 1.80                 | 0.02                 | Glycyl-Isoleucine                                                                                                                                      | 189 | 2.02                 | 0.07                 | 3-Indolepropionic acid                                                | 377 | 1.29                 | 0.00                  |
| Indecainide                | 655 | 2.84                 | 0.08                 | L-Glutamic acid                                                                                                                                        | 146 | 0.81                 | 0.05                 | 6-Chloroapigenin                                                      | 349 | 2.96                 | 2.02                  |
| Quinapril                  | 439 | 2.64                 | 94.11                | L-Arginine                                                                                                                                             | 173 | 0.73                 | 0.30                 | Austalide C                                                           | 592 | 2.65                 | 0.08                  |
| S-Japonin                  | 695 | 2.57                 | 7.79                 | Asp-Pro-Lys                                                                                                                                            | 359 | 1.85                 | 0.54                 | Indecainide                                                           | 655 | 2.84                 | 0.09                  |
| 3-Indolepropionic acid     | 377 | 1.29                 | 0.00                 | 2-(3-hydroxyphytyl)-3-phytyl-sn-glycerol                                                                                                               | 670 | 3.38                 | 9.46                 | 3-O-alpha-L-rhamnopyranosyl-3-hydroxy decanoyl-3-hydroxydecanoic acid | 543 | 3.00                 | 0.02                  |
| L-Leucine                  | 132 | 1.05                 | 0.10                 | 24, 24-difluoro-1alpha, 25-dihydroxy-26, 27-dimethyl-24a-homovitamin D3 / 24, 24-difluoro-1alpha, 25-dihydroxy-26, 27-dimethyl-24a-homocholecalciferol | 539 | 2.93                 | 393.11               | Methyl (5E, 17E)-18-bromo-octadeca-5, 17-diene-15-ynoate              | 735 | 3.82                 | 0.19                  |
| D-Ribulose 5-phosphate     | 211 | 0.97                 | 0.14                 | Iodotyrosine                                                                                                                                           | 306 | 1.77                 | 2.58                 | Isopentyl gentiobioside                                               | 430 | 2.42                 | 0.07                  |

|                                                                      |     |      |       |                                                     |     |      |              |                                                          |     |      |      |
|----------------------------------------------------------------------|-----|------|-------|-----------------------------------------------------|-----|------|--------------|----------------------------------------------------------|-----|------|------|
| Adenosine monophosphate                                              | 346 | 1.00 | 0.15  | 2'-Hydroxyfurano [2'', 3'':4', 3']<br>chalcone      | 309 | 0.73 | 0.18         | Monepalin B                                              | 779 | 1.24 | 0.18 |
| 2'-Hydroxyfurano[2'',3'':4',3']chalcone                              | 309 | 0.73 | 0.01  | Stemonacetal                                        | 799 | 3.32 | 19.24        | L-Leucine                                                | 132 | 1.05 | 0.16 |
| L-Glutamic acid                                                      | 146 | 0.81 | 0.15  | Naringenin                                          | 317 | 2.21 | 0.01         | Pro-Pro-Lys                                              | 363 | 2.47 | 0.03 |
| Phaseolic acid                                                       | 525 | 3.18 | 13.12 | 5-Oxo-ETE-d7                                        | 370 | 9.07 | 29.27        | L-Arginine                                               | 173 | 0.73 | 0.05 |
| Nitenin                                                              | 355 | 9.04 | 3.17  | Inosine                                             | 267 | 1.08 | 0.01         | Adenosine monophosphate                                  | 346 | 1.00 | 0.30 |
| Quinidine barbiturate                                                | 539 | 2.72 | 0.21  | PI (17:2(9Z, 12Z)/22:6(4Z, 7Z, 10Z, 13Z, 16Z, 19Z)) | 913 | 0.65 | 16.32        | Leukotriene E4                                           | 438 | 3.31 | 0.01 |
| Irinotecan                                                           | 587 | 3.25 | 0.04  | Fluocinolone acetonide                              | 470 | 1.33 | 0.06         | S-Adenosylhomocysteine                                   | 383 | 1.29 | 0.16 |
| 2-(3-hydroxyphytanyl)-3-phytanyl-sn-glycerol                         | 669 | 3.38 | 27.12 | Isopentyl gentiobioside                             | 430 | 2.42 | 2.79         | D-Ribulose 5-phosphate                                   | 211 | 0.97 | 0.21 |
| 5-Methoxytryptamine                                                  | 211 | 0.72 | 0.05  | Prosafrinine                                        | 328 | 8.32 | 82.30        | 5-Methoxytryptamine                                      | 211 | 0.72 | 0.06 |
| Malvidin 3-gentiobiside                                              | 654 | 2.90 | 0.25  | Guanosine                                           | 282 | 1.05 | 0.19         | Esprocarb                                                | 553 | 2.38 | 0.02 |
| S-Adenosylhomocysteine                                               | 383 | 1.29 | 0.12  | Flumethasone Pivalate                               | 512 | 2.78 | 6.66         | Liquiritigenin<br>7-apiofuranoside-4'-glucoside          | 571 | 2.73 | 0.16 |
| 3-O-alpha-L-rhamnopyranosyl-3-hydroxydecanoyl-3-hydroxydecanoic acid | 543 | 3.00 | 0.03  | Nitenin                                             | 355 | 9.04 | 2.10         | Palmatine cation                                         | 705 | 2.98 | 0.03 |
| L-Isoleucine                                                         | 130 | 1.29 | 0.01  | 7-Hydroxy-2-methylisoflavone                        | 503 | 0.85 | 0.32         | (+)-Myristinin A                                         | 569 | 2.97 | 0.08 |
| Morphiceptin                                                         | 504 | 2.98 | 0.13  | Phaseolic acid                                      | 525 | 3.18 | 15.41        | Malvidin 3-gentiobiside                                  | 654 | 2.90 | 0.27 |
| Stemonacetal                                                         | 799 | 3.32 | 24.96 | 17a-Ethynylestradiol                                | 341 | 8.29 | 1.65         | Tyrosyl-Histidine                                        | 654 | 2.13 | 7.72 |
| Tyrosyl-Histidine                                                    | 654 | 2.13 | 32.16 | 9Z-Heptatriacontene                                 | 502 | 3.21 | 0.14         | PI (20:3(8Z, 11Z, 14Z)/22:6(4Z, 7Z, 10Z, 13Z, 16Z, 19Z)) | 954 | 3.54 | 0.00 |
| Naringenin                                                           | 317 | 2.21 | 0.01  | 24-methylene-cholesterol sulphate                   | 499 | 1.31 | 13.75        | 5, 8, 11, 14-Octadecatetraynoic acid                     | 535 | 3.92 | 0.01 |
| Fluocinolone Acetonide                                               | 470 | 1.33 | 0.01  | Adenosine monophosphate                             | 346 | 1.00 | 0.51         | Brosimone H                                              | 485 | 1.17 | 0.02 |
| L-Histidine                                                          | 154 | 0.73 | 0.02  | N-palmitoyl alanine                                 | 372 | 8.32 | 14942.5<br>0 | 5-O-Desmethyldonepezil                                   | 366 | 3.22 | 0.02 |
| L-Tyrosine                                                           | 180 | 1.05 | 2.06  | L-Octanoylcarnitine                                 | 286 | 8.19 | 133.01       | PI (13:0/20:5(5Z, 8Z, 11Z, 14Z, 17Z))                    | 835 | 3.17 | 0.03 |

|                                                          |     |      |         |                                                                                                                  |     |      |         |                                                                                                                  |     |      |      |
|----------------------------------------------------------|-----|------|---------|------------------------------------------------------------------------------------------------------------------|-----|------|---------|------------------------------------------------------------------------------------------------------------------|-----|------|------|
| 7-Hydroxy-2-methylisoflavone                             | 503 | 0.85 | 0.19    | (6R)-6-methylvitamin D3 6, 19-sulphur dioxide adduct / (6R)-6-methylcholecalciferol 6, 19-sulphur dioxide adduct | 483 | 1.47 | 35.41   | Hirsutidin 3-O-(6-O-p-coumaroyl) glucoside                                                                       | 698 | 0.99 | 0.42 |
| Inosine                                                  | 267 | 1.08 | 0.01    | Di-2-propenyl pentasulphide                                                                                      | 502 | 3.21 | 0.13    | Patuletin 7-(6"-isobutyrylglucoside)                                                                             | 545 | 2.82 | 0.03 |
| Methyl (5E, 17E)-18-bromo-octadeca-5, 17-diene-15-ynoate | 735 | 3.82 | 0.31    | Myriocin                                                                                                         | 400 | 7.67 | 3003.47 | Flumethasone Pivalate                                                                                            | 512 | 2.78 | 0.19 |
| 9Z-Heptatriacontene                                      | 501 | 3.21 | 0.03    | Micropine                                                                                                        | 286 | 3.59 | 0.00    | Isoswertisin 6'''-O-feruloyl 2''-O-glucoside                                                                     | 765 | 0.90 | 0.46 |
| 1-Hexanol arabinosylglucoside                            | 414 | 2.36 | 0.40    | L-Histidine                                                                                                      | 154 | 0.73 | 0.25    | 4'-Methoxychalcone                                                                                               | 259 | 3.09 | 0.07 |
| Cytidine                                                 | 264 | 0.94 | 7.23    | Decanoylcarnitine                                                                                                | 314 | 7.95 | 38.44   | UDP-GlcNAc                                                                                                       | 652 | 1.07 | 0.43 |
| Di-2-propenyl pentasulphide                              | 501 | 3.21 | 0.02    | Cer (d18:1/2:0)                                                                                                  | 386 | 8.35 | 48.94   | (6R)-6-methylvitamin D3 6, 19-sulphur dioxide adduct / (6R)-6-methylcholecalciferol 6, 19-sulphur dioxide adduct | 483 | 1.47 | 0.00 |
| Gabapentin                                               | 216 | 4.26 | #DIV/0! | Palmitine cation                                                                                                 | 705 | 2.98 | 3.62    | Ouabain                                                                                                          | 605 | 3.71 | 0.20 |
| Esprocarb                                                | 553 | 2.38 | 0.03    | Predurmillone                                                                                                    | 401 | 0.85 | 0.38    | thevetin A                                                                                                       | 893 | 3.22 | 0.14 |
| Decanoylcarnitine                                        | 314 | 7.95 | 11.55   | N-palmitoyl glycine                                                                                              | 358 | 7.90 | 4685.16 | Ombuin 3-rutinoside-5-glucoside                                                                                  | 821 | 1.03 | 0.44 |
| 17a-Ethynylestradiol                                     | 341 | 8.29 | 2.10    | L-Tyrosine                                                                                                       | 180 | 1.05 | 1.37    | Gabapentin                                                                                                       | 216 | 4.26 | 6.84 |
| Pyroterebic acid                                         | 227 | 6.18 | #DIV/0! | Patuletin 7-(6"-isobutyrylglucoside)                                                                             | 545 | 2.82 | 5.48    | Exiguaflavanone M                                                                                                | 487 | 7.36 | 0.08 |
| N-palmitoyl alanine                                      | 372 | 8.32 | 7826.64 | PC (6:0/0:0)                                                                                                     | 376 | 3.97 | 20.92   | 5-Methoxytryptophol                                                                                              | 236 | 4.97 | 0.03 |
| UDP-GlcNAc                                               | 652 | 1.07 | 0.13    | Methyl (5E, 17E)-18-bromo-octadeca-5, 17-diene-15-ynoate                                                         | 735 | 3.82 | 1.63    | 7-Hydroxy-5-methoxy-6-methylflavan                                                                               | 315 | 0.81 | 0.19 |
| Pantothenic acid                                         | 218 | 2.19 | 53.76   | Gentiopiricin                                                                                                    | 377 | 0.81 | 0.18    | 2-Geranyl-3,4,2',4'-tetrahydroxydihydroc                                                                         | 819 | 1.56 | 0.03 |

|                                              |     |      |         |                              |     |      |         |                                                                                     |     |      |         |
|----------------------------------------------|-----|------|---------|------------------------------|-----|------|---------|-------------------------------------------------------------------------------------|-----|------|---------|
| halcone                                      |     |      |         |                              |     |      |         |                                                                                     |     |      |         |
| N-palmitoyl glycine                          | 358 | 7.90 | 2640.2  | Irinotecan                   | 587 | 3.25 | 0.46    | 3, 4-Dihydrocoumarin                                                                | 166 | 1.46 | 1.60    |
| 7                                            |     |      |         |                              |     |      |         |                                                                                     |     |      |         |
| Monepalin B                                  | 779 | 1.24 | 0.22    | Sphingofungin E              | 416 | 6.29 | #DIV/0! | 10S, 11R-epoxy-punaglandin 3                                                        | 557 | 0.90 | 0.40    |
| Sphingofungin E                              | 416 | 6.29 | #DIV/0! | UDP-GlcNAc                   | 652 | 1.07 | 0.31    | PA (20:3(8Z, 11Z, 14Z)/0:0)                                                         | 481 | 7.85 | 30.74   |
| !                                            |     |      |         |                              |     |      |         |                                                                                     |     |      |         |
| 6-Chloroapigenin                             | 349 | 2.96 | 1.71    | cis-5-Tetradecenoylcarnitine | 414 | 7.80 | 306.22  | 14, 15-HxA3-C(11S)                                                                  | 642 | 3.62 | 0.06    |
| Guanosine                                    | 282 | 1.05 | 0.26    | Sphingofungin F              | 400 | 6.85 | #DIV/0! | VD 2716                                                                             | 527 | 4.10 | 0.02    |
| Acacetin 7-glucuronosyl-(1->2)-glucuronide   | 681 | 0.73 | 0.02    | Hexanoylcarnitine            | 258 | 7.75 | 12.22   | Gamma-Glutamylglutamine                                                             | 256 | 1.17 | 0.10    |
| Micropine                                    | 286 | 3.59 | 0.01    | 5-O-Desmethyldonepezil       | 366 | 3.22 | 3.17    | PI (17:0/0:0)                                                                       | 585 | 5.15 | 0.00    |
| Myriocin                                     | 400 | 7.67 | 2221.0  | Pantothenic acid             | 218 | 2.19 | 10.74   | PS (12:0/0:0)                                                                       | 422 | 4.63 | #DIV/0! |
| 3                                            |     |      |         |                              |     |      |         |                                                                                     |     |      |         |
| 7-Hydroxy-5-methoxy-6-methylflavan           | 315 | 0.81 | 0.18    | PG (14:0/0:0)                | 501 | 8.00 | 175.18  | Wanepimedeside A                                                                    | 723 | 1.05 | 0.40    |
| 5-Hydroxylysine                              | 161 | 0.72 | 2.25    | 17, 18-dehydro-clavulone I   | 887 | 4.12 | 9.53    | 6-hydroxy-7E, 9E-Octadecadiene-11, 13, 15, 17-tetraynoic acid                       | 559 | 1.51 | 0.16    |
| PI (13:0/20:5(5Z, 8Z, 11Z, 14Z, 17Z))        | 835 | 3.17 | 0.04    | Thymidine                    | 241 | 1.57 | 0.11    | Pantothenic acid                                                                    | 218 | 2.19 | 5.01    |
| Liquiritigenin 7-apiofuranoside-4'-glucoside | 571 | 2.73 | 0.14    | N-oleoyl glycine             | 384 | 7.97 | 515.73  | Scilliroside                                                                        | 585 | 3.85 | 0.09    |
| PA (20:3(8Z, 11Z, 14Z)/0:0)                  | 481 | 7.85 | 83.49   | Brosimone H                  | 485 | 1.17 | 3.47    | 17, 18-dehydro-clavulone I                                                          | 887 | 4.12 | 0.07    |
| 3, 4-Dihydrocoumarin                         | 166 | 1.46 | 1.67    | 2, 5-undecadienal            | 187 | 2.21 | 0.02    | Linocide B                                                                          | 681 | 2.34 | 0.22    |
| Sphingofungin F                              | 400 | 6.85 | #DIV/0! | 3-Indolepropionic acid       | 377 | 1.29 | 0.60    | Testosterone glucuronide                                                            | 509 | 3.42 | 0.08    |
| !                                            |     |      |         |                              |     |      |         |                                                                                     |     |      |         |
| 5, 8, 11, 14-Octadecatetraynoic acid         | 535 | 3.92 | 0.01    | Sphingofungin C              | 430 | 6.53 | #DIV/0! | (-)-Jolkinol A                                                                      | 525 | 2.93 | 0.04    |
| Okanin 4'-(6"-p-coumarylglucoside)           | 595 | 0.90 | 0.39    | Morphiceptin                 | 504 | 2.98 | 0.51    | Butyl 3'-O-acetyl-2'-O-butanoyl-4, 6, 4'-tri-O-(2-methylpropanoyl)-neohesperidoside | 749 | 1.84 | 0.00    |
| Aminoacetone                                 | 145 | 0.72 | 1.87    | 4'-Chloroaurone              | 277 | 2.21 | 0.00    | Coproporphyrin III                                                                  | 635 | 3.27 | 0.19    |
| Gentiopiricin                                | 377 | 0.81 | 0.20    | O-Phosphoethanolamine        | 281 | 1.03 | 0.17    | PGP (16:0/18:1(9Z))                                                                 | 809 | 5.71 | 0.00    |

|                                                          |     |      |        |                                              |     |      |       |                                                                                         |     |      |      |
|----------------------------------------------------------|-----|------|--------|----------------------------------------------|-----|------|-------|-----------------------------------------------------------------------------------------|-----|------|------|
| O-Phosphoethanolamine                                    | 281 | 1.03 | 0.08   | Acacetin                                     | 681 | 0.73 | 0.26  | Methylimidazoleacetic acid                                                              | 185 | 0.90 | 0.45 |
|                                                          |     |      |        | 7-glucuronosyl-(1->2)-glucuronide            |     |      |       |                                                                                         |     |      |      |
| Thymidine                                                | 241 | 1.57 | 0.06   | L-Leucine                                    | 132 | 1.05 | 0.63  | Catechin 3-O-rutinoside                                                                 | 597 | 1.02 | 0.48 |
| PI (20:3(8Z, 11Z, 14Z)/22:6(4Z, 7Z, 10Z, 13Z, 16Z, 19Z)) | 953 | 3.54 | 0.00   | Gallocatechin 4'-methyl ether                | 341 | 1.28 | 0.13  | 7, 8, 7', 8'-Tetrahydroastaxanthin                                                      | 613 | 1.63 | 0.00 |
| PI (17:2(9Z, 12Z)/22:6(4Z, 7Z, 10Z, 13Z, 16Z, 19Z))      | 913 | 0.65 | 11.95  | Thevetin A                                   | 893 | 3.22 | 2.98  | 3'-Geranyl-2', 4', 6'-trihydroxychalcone                                                | 783 | 1.35 | 0.07 |
| Ouabain                                                  | 605 | 3.71 | 0.23   | Leukotriene C4                               | 624 | 2.66 | 7.04  | PS (22:2(13Z, 16Z)/0:0)                                                                 | 598 | 3.12 | 0.04 |
| 2, 5-undecadienal                                        | 187 | 2.21 | 0.00   | 7, 8, 7', 8'-Tetrahydroastaxanthin           | 613 | 1.63 | 7.69  | 12-oxo-5E, 8E, 10Z-dodecatrienoic acid                                                  | 229 | 1.09 | 0.11 |
| (+)-Myristinin A                                         | 569 | 2.97 | 0.08   | Melatonin                                    | 277 | 2.25 | 0.06  | Ikariside D                                                                             | 523 | 2.35 | 0.04 |
| PGP (18:3(6Z, 9Z, 12Z)/18:3(6Z, 9Z, 12Z))                | 885 | 3.22 | 45.70  | Caloxanthin sulphate                         | 685 | 2.77 | 15.10 | L-Tyrosine                                                                              | 180 | 1.05 | 1.50 |
| PC (6:0/0:0)                                             | 376 | 3.97 | 228.60 | Vicenin-1 6''-O-acetate                      | 627 | 1.05 | 0.63  | Gossypol                                                                                | 517 | 1.05 | 0.28 |
| 2, 4, 7-tridecatrienal                                   | 213 | 1.29 | 0.04   | Epsilon-(gamma-Glutamyl)-lysine              | 274 | 2.80 | 0.00  | 17alpha-(N-Acetyl-D-glucosaminyl)-estra diol 3-D-glucuronide                            | 632 | 3.79 | 0.12 |
| 3-Indoleacrylic acid                                     | 205 | 2.20 | 1.54   | Scillaren A                                  | 673 | 0.63 | 4.57  | 6-Hydroxyluteolin                                                                       | 549 | 1.15 | 0.39 |
|                                                          |     |      |        |                                              |     |      |       | 7-(6''-malonylglucoside)                                                                |     |      |      |
| Gallocatechin 4'-methyl ether                            | 341 | 1.28 | 0.09   | Isoauricularin                               | 839 | 3.69 | 1.78  | (25S)-11alpha, 20, 26-trihydroxyecdysone                                                | 557 | 3.89 | 0.04 |
| 3'-Deoxymaysin                                           | 541 | 0.81 | 0.60   | D-Ribulose 5-phosphate                       | 211 | 0.97 | 0.68  | Leukotriene C4                                                                          | 624 | 2.66 | 0.05 |
| Scilliroside                                             | 585 | 3.85 | 0.04   | Tephrowatsin B                               | 671 | 3.68 | 0.11  | Catechin 5, 3'-di-O-beta-D-glucopyranoside                                              | 595 | 2.27 | 0.10 |
| 14, 15-HxA3-C(11S)                                       | 642 | 3.62 | 0.08   | Eggregiachloride C                           | 703 | 4.04 | 0.25  | O-Desmethylanolensin                                                                    | 515 | 1.05 | 0.40 |
| Melatonin                                                | 277 | 2.25 | 0.00   | Isoswertisin 6'''-O-feruloyl 2''-O-glucoside | 765 | 0.90 | 1.38  | 27-nor-campestan-3beta, 4beta, 5alpha, 6alpha, 7beta, 8beta, 14alpha, 15alpha, 24-nonol | 537 | 4.26 | 0.01 |
| 4'-Methoxychalcone                                       | 259 | 3.09 | 0.07   | Artomunoxanthentrione                        | 465 | 1.03 | 0.55  | 5, 7, 3', 4'-Tetrahydroxyflavanone                                                      | 581 | 2.28 | 0.11 |
|                                                          |     |      |        |                                              |     |      |       | 7-alpha-L-arabinofuranosyl-(1->6)-                                                      |     |      |      |

|                                                                                         |     |      |       |                                                                   |     |      |       |                                                                         |     |      |      |
|-----------------------------------------------------------------------------------------|-----|------|-------|-------------------------------------------------------------------|-----|------|-------|-------------------------------------------------------------------------|-----|------|------|
|                                                                                         |     |      |       |                                                                   |     |      |       | glucoside                                                               |     |      |      |
| Brosimone H                                                                             | 485 | 1.17 | 0.08  | PI (18:4(6Z, 9Z, 12Z, 15Z)/22:6(4Z, 7Z, 10Z, 13Z, 16Z, 19Z))      | 923 | 2.55 | 0.05  | 29-demethylgeodisterol-O-sulphite                                       | 513 | 1.03 | 0.19 |
| 5-Methoxytryptophol                                                                     | 236 | 4.97 | 0.04  | Quassin                                                           | 775 | 3.04 | 3.75  | Coproporphyrinogen I                                                    | 641 | 3.12 | 0.13 |
| Villinol                                                                                | 483 | 1.77 | 0.08  | PI (22:6(4Z, 7Z, 10Z, 13Z, 16Z, 19Z)/20:5(5Z, 8Z, 11Z, 14Z, 17Z)) | 974 | 4.07 | 0.09  | Geodisterol-O-sulphite                                                  | 527 | 3.28 | 0.11 |
| 27-nor-campestan-3beta, 4beta, 5alpha, 6alpha, 7beta, 8beta, 14alpha, 15alpha, 24-nonol | 537 | 4.26 | 0.01  | Cys-Arg-Arg                                                       | 889 | 3.47 | 24.37 | SQMG (16:1(9Z)/0:0)                                                     | 575 | 3.47 | 0.17 |
| Nicotinuric acid                                                                        | 225 | 1.03 | 12.53 | PA (14:1(9Z)/22:6(4Z, 7Z, 10Z, 13Z, 16Z, 19Z))                    | 711 | 5.08 | 45.36 | Salicifolioside A                                                       | 607 | 1.52 | 0.26 |
| Patuletin 7-(6''-isobutyrylglucoside)                                                   | 545 | 2.82 | 0.16  | Okainin 4'-(6''-p-coumarylglucoside)                              | 595 | 0.90 | 0.59  | PG (14:0/0:0)                                                           | 501 | 8.00 | 0.06 |
| Norepinephrine sulphate                                                                 | 294 | 1.84 | 1.19  | Lithocholytaurine                                                 | 528 | 4.66 | 0.03  | Peonidin 3-(6''-p-coumarylglucoside)                                    | 654 | 1.52 | 0.43 |
| PS (22:2(13Z, 16Z)/0:0)                                                                 | 598 | 3.12 | 0.06  | 1(3)-glyceryl-6-keto-PGF1alpha                                    | 489 | 4.59 | 0.07  | Herbacetin 3-glucoside-8-xyloside                                       | 641 | 1.05 | 0.58 |
| PI (17:0/0:0)                                                                           | 585 | 5.15 | 0.00  | L-Isoleucine                                                      | 130 | 1.29 | 0.62  | Diuvaretin                                                              | 483 | 1.07 | 0.36 |
| (+)-Tephrocin A                                                                         | 425 | 2.24 | 0.01  | Merodesmosine                                                     | 385 | 3.21 | 0.41  | Pelargonidin 3-lathyroside                                              | 586 | 2.08 | 0.08 |
| Scillaren A                                                                             | 673 | 0.63 | 7.75  | Leukotriene E4                                                    | 438 | 3.31 | 1.73  | Nostoxanthin sulphate                                                   | 683 | 3.38 | 0.06 |
| Gossypol                                                                                | 517 | 1.05 | 0.27  | Cerotic acid (d3)                                                 | 798 | 1.63 | 0.24  | PS (19:1(9Z)/0:0)                                                       | 558 | 4.31 | 0.11 |
| 2-O-(beta-D-galactopyranosyl-(1->6)-beta-D-galactopyranosyl) 2S-hydroxynonanoic acid    | 479 | 4.49 | 10.20 | Salicifolioside A                                                 | 607 | 1.52 | 2.26  | 2', 4', 6', 3, 4-Pentahydroxy-3'-geranyl-5-prenyldihydrochalcone        | 988 | 4.59 | 0.02 |
| 15-HETE-T                                                                               | 426 | 3.31 | 0.02  | Villinol                                                          | 483 | 1.77 | 0.34  | Aminoacetone                                                            | 145 | 0.72 | 1.66 |
| 6-Hydroxyluteolin 7-(6''-malonylglucoside)                                              | 549 | 1.15 | 0.31  | Hirsutidin 3-O-(6-O-p-coumaroyl) glucoside                        | 698 | 0.99 | 1.34  | 3-Indoleacrylic acid                                                    | 205 | 2.20 | 1.40 |
| Tephrowatsin B                                                                          | 671 | 3.68 | 0.02  | 3'-Deoxymaysin                                                    | 541 | 0.81 | 0.76  | Butyl 3'-O-butanoyl-4, 6, 4'-tri-O-(2-methylpropanoyl)-neohesperidoside | 683 | 2.52 | 0.13 |

|                                                                   |     |      |      |                                                                                                                                              |     |      |      |                                                                                      |     |      |       |
|-------------------------------------------------------------------|-----|------|------|----------------------------------------------------------------------------------------------------------------------------------------------|-----|------|------|--------------------------------------------------------------------------------------|-----|------|-------|
| Exiguaflavanone M                                                 | 487 | 7.36 | 0.06 | 6-bromo-heneicosa-5E,9Z-dienoic acid                                                                                                         | 399 | 2.67 | 0.22 | Quassin                                                                              | 775 | 3.04 | 0.07  |
| Ac-Ser-Asp-Lys-Pro-OH                                             | 488 | 2.23 | 1.45 | GS 1500                                                                                                                                      | 541 | 4.35 | 0.21 | Caloxanthin sulphate                                                                 | 685 | 2.77 | 0.01  |
| Cerotic acid(d3)                                                  | 797 | 1.63 | 0.03 | Diuvaretin                                                                                                                                   | 483 | 1.07 | 1.75 | Anhydroicaritin                                                                      | 883 | 1.48 | 0.36  |
|                                                                   |     |      |      |                                                                                                                                              |     |      |      | 3-galactosyl-(1->3)-rhamnoside-7-glucoside                                           |     |      |       |
| PGP (16:0/18:1(9Z))                                               | 809 | 5.71 | 0.00 | (6RS, 24R)-24, 25-dihydroxyvitamin D3 6, 19-sulphur dioxide adduct / (6RS, 24R)-24, 25-dihydroxycholecalciferol 6, 19-sulphur dioxide adduct | 501 | 1.96 | 3.70 | PI (12:0/14:1(9Z))                                                                   | 745 | 3.63 | 0.02  |
| (25S)-11alpha,20,26-trihydroxycdysone                             | 557 | 3.89 | 0.04 | Moralbanone                                                                                                                                  | 471 | 1.34 | 0.15 | 2', 3', 4', 6'-Tetramethoxychalcone                                                  | 655 | 2.87 | 0.28  |
| 12-oxo-5E,8E,10Z-dodecatrienoic acid                              | 229 | 1.09 | 0.13 | 7, 8, 4'-Trihydroxy-3', 5'-dimethoxyflavanone 4'-O-glucoside                                                                                 | 539 | 0.81 | 0.69 | PC (6:0/0:0)                                                                         | 376 | 3.97 | 10.93 |
| VD 2716                                                           | 527 | 4.10 | 0.02 | 1,25-Dihydroxy-20S-21-(3-hydroxy-3-methylbutyl)-23-yne-26, 27-hexafluorovitamin D3                                                           | 587 | 1.63 | 3.77 | 2-O-(beta-D-galactopyranosyl-(1->6)-beta-D-galactopyranosyl) 2S-hydroxynonanoic acid | 479 | 4.49 | 14.62 |
| Testosterone glucuronide                                          | 509 | 3.42 | 0.09 | 3'-Geranyl-2',4',6'-trihydroxychalcone                                                                                                       | 783 | 1.35 | 2.25 | Decanoylcarnitine                                                                    | 314 | 7.95 | 0.30  |
| 2-Geranyl-3, 4, 2', 4'-tetrahydroxydihydrochalcone                | 819 | 1.56 | 0.03 | 3, 5, 6-Trimethoxy-3', 4'-methylene-dioxyfurano[2, 3:7, 8]flavone                                                                            | 417 | 0.73 | 0.73 | Ikariside F                                                                          | 631 | 1.19 | 0.29  |
| Gamma-Glutamylglutamine                                           | 256 | 1.17 | 0.11 | PA (12:0/14:1(9Z))                                                                                                                           | 583 | 4.32 | 3.85 | Peonanin                                                                             | 916 | 1.14 | 0.38  |
| Epsilon-(gamma-Glutamyl)-lysine                                   | 274 | 2.81 | 0.05 | Ustilagic acid                                                                                                                               | 783 | 3.92 | 0.35 | Triuvaretin                                                                          | 589 | 3.79 | 0.21  |
| Ustilagic acid                                                    | 783 | 3.92 | 0.05 | Coproporphyrin III                                                                                                                           | 635 | 3.27 | 1.82 | PI (16:0/0:0)                                                                        | 617 | 4.63 | 0.13  |
| PI (22:6(4Z, 7Z, 10Z, 13Z, 16Z, 19Z)/20:5(5Z, 8Z, 11Z, 14Z, 17Z)) | 974 | 4.07 | 0.00 | PI (13:0/20:5(5Z, 8Z, 11Z, 14Z, 17Z))                                                                                                        | 835 | 3.17 | 1.64 | Brosimacutin C                                                                       | 683 | 1.54 | 0.17  |
| (-)-Jolkinol A                                                    | 525 | 2.93 | 0.04 | Isoamoritin                                                                                                                                  | 487 | 3.12 | 0.29 | Carpelastofuran                                                                      | 567 | 1.39 | 0.23  |
| Piperaduncin A                                                    | 489 | 1.05 | 0.12 | Scilliroside                                                                                                                                 | 585 | 3.85 | 0.48 | Piperaduncin A                                                                       | 489 | 1.05 | 0.18  |
| Butyl 3'-O-acetyl-2'-O-butanoyl-4, 6,                             | 749 | 1.84 | 0.01 | Methyl jasmonate                                                                                                                             | 245 | 1.07 | 0.34 | 2'-O-Methylcajanone                                                                  | 417 | 1.28 | 0.16  |

|                                                                                   |     |      |      |                                                                                        |     |      |      |                                              |     |      |      |  |
|-----------------------------------------------------------------------------------|-----|------|------|----------------------------------------------------------------------------------------|-----|------|------|----------------------------------------------|-----|------|------|--|
| 4'-tri-O-(2-methylpropanoyl)-neohesperido<br>side                                 |     |      |      |                                                                                        |     |      |      |                                              |     |      |      |  |
| 10S, 11R-epoxy-punaglandin 3                                                      | 557 | 0.90 | 0.48 | 2, 4, 7-tridecatrienal                                                                 | 213 | 1.29 | 0.54 | Anhydroicaritin                              | 659 | 1.59 | 0.20 |  |
|                                                                                   |     |      |      |                                                                                        |     |      |      | 3-rhamnosyl-(1->2)-rhamnoside                |     |      |      |  |
| GS 1500                                                                           | 541 | 4.35 | 0.00 | 29-demethylgeodisterol-O-sulphite                                                      | 513 | 1.03 | 1.72 | Tephrowatsin B                               | 671 | 3.68 | 0.14 |  |
| PI (18:4(6Z, 9Z, 12Z, 15Z)/22:6(4Z, 7Z, 10Z, 13Z, 16Z, 19Z))                      | 923 | 2.55 | 0.02 | PI (12:0/14:1(9Z))                                                                     | 745 | 3.63 | 2.08 | Nicotinuric acid                             | 225 | 1.03 | 6.44 |  |
| Nostoxanthin sulphate                                                             | 683 | 3.38 | 0.06 | 9, 12, 13-TriHOME                                                                      | 329 | 7.30 | 0.27 | Leucadenone A                                | 539 | 2.31 | 0.08 |  |
| SQMG (16:1(9Z)/0:0)                                                               | 575 | 3.47 | 0.25 | SQDG (22:5(5Z, 8Z, 11Z, 14Z, 17Z)/16:1(13Z))                                           | 861 | 4.70 | 2.40 | SQDG (22:5(5Z, 8Z, 11Z, 14Z, 17Z)/16:1(13Z)) | 861 | 4.70 | 0.00 |  |
| 7, 8, 4'-Trihydroxy-3',<br>5'-dimethoxyflavanone 4'-O-glucoside                   | 539 | 0.81 | 0.61 | Chenodeoxycholic acid 3-glucuronide                                                    | 589 | 4.46 | 0.29 | Leukotriene D4                               | 495 | 2.60 | 0.01 |  |
| 3'-Geranyl-2', 4', 6'-trihydroxychalcone                                          | 783 | 1.35 | 0.15 | Butyl 3'-O-acetyl-2'-O-butanoyl-4, 6,<br>4'-tri-O-(2-methylpropanoyl)-neohesperidoside | 749 | 1.84 | 1.82 | (+)-Tephrocin A                              | 425 | 2.24 | 0.02 |  |
| Coproporphyrinogen I                                                              | 641 | 3.12 | 0.15 | (+)-Tephrocin A                                                                        | 425 | 2.24 | 0.50 | Epimedin C                                   | 803 | 1.84 | 0.26 |  |
| geodisterol-O-sulphite                                                            | 527 | 3.28 | 0.13 | Peonidin 3-(6''-p-coumarylglucoside)                                                   | 654 | 1.52 | 1.33 | 18-acetoxy-PGF2alpha-11-acetate methyl ester | 513 | 3.82 | 0.03 |  |
| Catechin 5, 3'-di-O-beta-D-glucopyranoside                                        | 595 | 2.27 | 0.09 | Alpinumisoflavone dimethyl ether                                                       | 727 | 3.02 | 1.34 | rhodexin A                                   | 581 | 4.84 | 0.00 |  |
| 5, 7, 3', 4'-Tetrahydroxyflavanone<br>7-alpha-L-arabinofuranosyl-(1->6)-glucoside | 581 | 2.28 | 0.10 | Citric acid                                                                            | 191 | 1.05 | 0.45 | Taurochenodeoxycholic acid 3-sulphate        | 562 | 4.33 | 0.07 |  |
| Deoxyipyridinolone                                                                | 457 | 3.50 | 0.20 | Catechin 3-O-rutinoside                                                                | 597 | 1.02 | 1.26 | PA (12:0/14:1(9Z))                           | 583 | 4.32 | 0.00 |  |
| Methylimidazoleacetic acid                                                        | 185 | 0.90 | 0.54 | Esprocarb                                                                              | 553 | 2.38 | 1.33 | Alpinumisoflavone dimethyl ether             | 727 | 3.02 | 0.49 |  |
| 6-hydroxy-7E, 9E-Octadecadiene-11, 13, 15, 17-tetraynoic acid                     | 559 | 1.51 | 0.19 | PS (18:3(6Z, 9Z, 12Z)/22:6(4Z, 7Z, 10Z, 13Z, 16Z, 19Z))                                | 810 | 5.00 | 0.40 | PI (20:5(5Z, 8Z, 11Z, 14Z, 17Z)/0:0)         | 617 | 3.59 | 0.25 |  |
| Isoamoritin                                                                       | 487 | 3.12 | 0.01 | Epothilone B                                                                           | 488 | 4.64 | 0.46 | 26, 26, 26, 27, 27, 27-hexafluoro-1alpha,    | 499 | 4.07 | 0.13 |  |

|                                                                         |     |      |      |                                                                |     |      |      |                                                                                                                                                                                  |     |      |      |
|-------------------------------------------------------------------------|-----|------|------|----------------------------------------------------------------|-----|------|------|----------------------------------------------------------------------------------------------------------------------------------------------------------------------------------|-----|------|------|
|                                                                         |     |      |      |                                                                |     |      |      | 25-dihydroxy-16, 17, 23, 23, 24,<br>24-hexadehydrovitamin D3 / 26, 26, 26,<br>27, 27, 27-hexafluoro-1alpha,<br>25-dihydroxy-16, 17, 23, 23, 24,<br>24-hexadehydrocholecalciferol |     |      |      |
| Hirsutidin 3-O-(6-O-p-coumaroyl) glucoside                              | 698 | 0.99 | 0.57 | 17alpha-(N-Acetyl-D-glucosaminy)-<br>estradiol 3-D-glucuronide | 632 | 3.79 | 0.56 | Ustilagic acid                                                                                                                                                                   | 783 | 3.92 | 0.13 |
| 2', 4', 6', 3,<br>4-Pentahydroxy-3'-geranyl-5-prenyldihydro<br>chalcone | 988 | 4.59 | 0.01 | 14, 15-HxA3-C(11S)                                             | 642 | 3.62 | 1.46 | Taurochenodeoxycholic acid 7-sulphate                                                                                                                                            | 578 | 4.10 | 0.25 |
| O-Desmethylangolensin                                                   | 515 | 1.05 | 0.44 | UDP-2, 3-diacyl-GlcN                                           | 998 | 3.06 | 1.36 | Moralbanone                                                                                                                                                                      | 471 | 1.34 | 0.13 |
| 6-bromo-heneicosa-5E, 9Z-dienoic acid                                   | 399 | 2.67 | 0.10 | SQMG (16:1(9Z)/0:0)                                            | 575 | 3.47 | 1.42 | Protoporphyrin IX                                                                                                                                                                | 543 | 2.94 | 0.27 |
| Ikariside F                                                             | 631 | 1.19 | 0.33 | Sempervirenoside B                                             | 895 | 2.67 | 1.40 | Isosophoranone                                                                                                                                                                   | 875 | 1.84 | 0.06 |
| Ombuin 3-rutinoside-5-glucoside                                         | 821 | 1.03 | 0.53 | 10S, 11R-epoxy-punaglandin 3                                   | 557 | 0.90 | 1.20 | Cys-Arg-Arg                                                                                                                                                                      | 889 | 3.47 | 0.03 |
| 17alpha-(N-Acetyl-D-glucosaminy)-<br>estradiol 3-D-glucuronide          | 632 | 3.79 | 0.07 |                                                                |     |      |      | epothilone D                                                                                                                                                                     | 512 | 1.56 | 0.02 |
| PI (12:0/14:1(9Z))                                                      | 745 | 3.63 | 0.05 |                                                                |     |      |      | Chaetoglobosin A                                                                                                                                                                 | 573 | 1.32 | 0.14 |
| Vicenin-1 6"-O-acetate                                                  | 627 | 1.05 | 0.63 |                                                                |     |      |      | Adonixanthin/ 4-Ketozeaxanthin                                                                                                                                                   | 627 | 4.78 | 0.69 |
| 18-acetoxy-PGF2alpha-11-acetate methyl<br>ester                         | 513 | 3.82 | 0.03 |                                                                |     |      |      | PS (8:0/8:0)                                                                                                                                                                     | 556 | 4.49 | 0.11 |
| Poriolide                                                               | 611 | 0.90 | 0.61 |                                                                |     |      |      | 2-O-(beta-D-galactopyranosyl-(1->6)-beta<br>-D-galactopyranosyl)<br>2S-hydroxyundecanoic acid                                                                                    | 547 | 2.00 | 0.08 |
| Anhydroicaritin<br>3-rhamnosyl-(1->2)-rhamnoside                        | 659 | 1.59 | 0.23 |                                                                |     |      |      | Brousoflavan A                                                                                                                                                                   | 851 | 4.78 | 0.18 |
| Moralbanone                                                             | 471 | 1.34 | 0.02 |                                                                |     |      |      | Euchrenone a14                                                                                                                                                                   | 517 | 2.90 | 0.16 |
| Taurochenodeoxycholic acid 3-sulphate                                   | 562 | 4.33 | 0.08 |                                                                |     |      |      | 2-O-(beta-D-galactopyranosyl-(1->6)-beta                                                                                                                                         | 575 | 2.77 | 0.15 |

|                                      |     |      |             |                                                                          |     |      |       |
|--------------------------------------|-----|------|-------------|--------------------------------------------------------------------------|-----|------|-------|
|                                      |     |      |             | -D-galactopyranosyl)                                                     |     |      |       |
|                                      |     |      |             | 2S-hydroxytridecanoic acid                                               |     |      |       |
| Pelargonidin 3-lathyroside           | 586 | 2.08 | 0.07        | N-palmitoyl alanine                                                      | 372 | 8.32 | 0.52  |
| PS (19:1(9Z)/0:0)                    | 558 | 4.31 | 0.08        | Ac-Ser-Asp-Lys-Pro-OH                                                    | 488 | 2.23 | 1.37  |
| Rhodexin A                           | 581 | 4.84 | 0.00        | 5-Hydroxy-6, 7, 3', 4',<br>5'-pentamethoxyflavanone<br>5-O-rhamnoside    | 581 | 1.39 | 0.50  |
| 7, 8, 7', 8'-Tetradehydroastaxanthin | 613 | 1.63 | 0.04        | thevetin B                                                               | 903 | 4.28 | 0.40  |
| PA (17:0/0:0)                        | 445 | 3.51 | 0.01        | Genistein 7-O-glucoside-6''-malonate                                     | 563 | 2.08 | 0.26  |
| PA (18:4(6Z, 9Z, 12Z, 15Z)/0:0)      | 475 | 2.90 | 0.14        | PGF2alpha-dihydroxypropanylamine                                         | 854 | 5.25 | 0.45  |
| Triuvaretin                          | 589 | 3.79 | 0.31        | Sempervirenoside B                                                       | 895 | 2.67 | 0.55  |
| 3-Methyl-2-oxovaleric acid           | 175 | 3.45 | #DIV/0<br>! | N-palmitoyl glycine                                                      | 358 | 7.90 | 0.56  |
| Methyl jasmonate                     | 245 | 1.07 | 0.14        | 11-Oxo-androsterone glucuronide                                          | 525 | 4.03 | 0.60  |
| Carpelastofuran                      | 567 | 1.39 | 0.29        | 3, 5, 6-Trimethoxy-3',<br>4'-methylene-dioxyfurano [2, 3:7,<br>8]flavone | 417 | 0.73 | 1.32  |
| Herbacetin 3-glucoside-8-xyloside    | 641 | 1.05 | 0.63        | Neoglabrescin A                                                          | 899 | 2.49 | 2.13  |
| Epothilone B                         | 488 | 4.64 | 0.00        | UDP-2, 3-diacyl-GlcN                                                     | 998 | 3.06 | 1.58  |
| Chandalone                           | 449 | 0.73 | 3.18        | Porphobilinogen                                                          | 225 | 2.03 | 1.38  |
| 2'-O-Methylcajanone                  | 417 | 1.28 | 0.15        | Nonoxynol-9                                                              | 634 | 7.99 | 19.62 |
| thevetin A                           | 893 | 3.22 | 0.43        |                                                                          |     |      |       |
| Antiarone J                          | 911 | 5.30 | 0.05        |                                                                          |     |      |       |
| Xanthine                             | 151 | 0.99 | 0.55        |                                                                          |     |      |       |
| Brosimacutin C                       | 683 | 1.54 | 0.24        |                                                                          |     |      |       |
| 2', 3', 4', 6'-Tetramethoxychalcone  | 655 | 2.87 | 0.36        |                                                                          |     |      |       |
| Leucadenone A                        | 539 | 2.31 | 0.08        |                                                                          |     |      |       |

|                                                                                                                                                                                                                               |     |      |      |
|-------------------------------------------------------------------------------------------------------------------------------------------------------------------------------------------------------------------------------|-----|------|------|
| Butyl 3'-O-butanoyl-4, 6,<br>4'-tri-O-(2-methylpropanoyl)-neohesperido<br>side                                                                                                                                                | 683 | 2.52 | 0.15 |
| 26, 26, 26, 27, 27, 27-hexafluoro-1alpha,<br>25-dihydroxy-16, 17, 23, 23, 24,<br>24-hexadehydrovitamin D3 / 26, 26, 26, 27,<br>27, 27-hexafluoro-1alpha, 25-dihydroxy-16,<br>17, 23, 23, 24,<br>24-hexadehydrocholecalciferol | 499 | 4.07 | 0.12 |
| PS (8:0/8:0)                                                                                                                                                                                                                  | 556 | 4.49 | 0.09 |
| Leukotriene D4                                                                                                                                                                                                                | 495 | 2.60 | 0.00 |
| PI (20:5(5Z, 8Z, 11Z, 14Z, 17Z)/0:0)                                                                                                                                                                                          | 617 | 3.59 | 0.29 |
| PGF2alpha-dihydroxypropylamine                                                                                                                                                                                                | 853 | 5.25 | 0.42 |
| PS<br>(18:3(6Z,9Z,12Z)/22:6(4Z,7Z,10Z,13Z,16Z,19<br>Z))                                                                                                                                                                       | 810 | 4.50 | 0.00 |
| UDP-2,3-diacyl-GlcN                                                                                                                                                                                                           | 998 | 3.06 | 2.14 |
| PS (18:1(9Z)/0:0)                                                                                                                                                                                                             | 544 | 4.03 | 0.08 |
| epothilone D                                                                                                                                                                                                                  | 512 | 1.56 | 0.02 |
| 2-O-(beta-D-galactopyranosyl-(1->6)-beta-D<br>-galactopyranosyl) 2S-hydroxyundecanoic<br>acid                                                                                                                                 | 547 | 2.00 | 0.07 |
| Anhydroicaritin<br>3-galactosyl-(1->3)-rhamnoside-7-glucoside                                                                                                                                                                 | 883 | 1.48 | 0.41 |
| Linocide B                                                                                                                                                                                                                    | 681 | 2.34 | 0.29 |
| PI (16:0/0:0)                                                                                                                                                                                                                 | 617 | 4.63 | 0.19 |
| Neoglabrescin A                                                                                                                                                                                                               | 899 | 2.49 | 3.36 |

|                                                                                                |     |      |      |
|------------------------------------------------------------------------------------------------|-----|------|------|
| Protoporphyrin IX                                                                              | 543 | 2.94 | 0.32 |
| Brousoflavan A                                                                                 | 851 | 4.78 | 0.16 |
| Chenodeoxycholic acid 3-glucuronide                                                            | 589 | 4.46 | 0.05 |
| Euchrenone a14                                                                                 | 517 | 2.90 | 0.13 |
| Chaetoglobosin A                                                                               | 573 | 1.32 | 0.14 |
| Peonanin                                                                                       | 916 | 1.14 | 0.47 |
| Sulphamisterin                                                                                 | 460 | 2.00 | 0.15 |
| Catechin 3-O-rutinoside                                                                        | 597 | 1.02 | 0.61 |
| Ptilosteroid A                                                                                 | 445 | 3.15 | 0.26 |
| Leukotriene C4                                                                                 | 624 | 2.66 | 0.35 |
| thevetin B                                                                                     | 903 | 4.28 | 0.41 |
| 2-O-(beta-D-galactopyranosyl-(1->6)-beta-D<br>-galactopyranosyl) 2S-hydroxytridecanoic<br>acid | 575 | 2.77 | 0.19 |
| Genistein 7-O-glucoside-6''-malonate                                                           | 563 | 2.08 | 0.26 |
| 5-Hydroxy-6, 7, 3', 4',<br>5'-pentamethoxyflavanone<br>5-O-rhamnoside                          | 581 | 1.39 | 0.51 |
| Alpinumisoflavone dimethyl ether                                                               | 727 | 3.02 | 0.65 |
| 9, 12, 13-TriHOME                                                                              | 329 | 7.30 | 0.29 |
| Porphobilinogen                                                                                | 225 | 2.03 | 1.54 |
| 17, 18-dehydro-clavulone I                                                                     | 887 | 4.12 | 0.64 |
| 11-Oxo-androsterone glucuronide                                                                | 525 | 4.03 | 0.66 |
