# Supplementary material
Source: publisher figshare collection journal article supplement (https://tandf.figshare.com/articles/dataset/_/8791991)

## Biotechnol. Biotechnol. Equip. 2019, 33

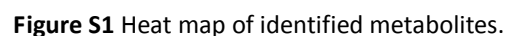

Supplement: Supplementary file 1 [file 1 › tbeq_a_1637279_sm5475.pdf]
